# Supplementary material for: Promoting effect of MXenes on 1T/2H–MoSe2 for hydrogen evolution
Source: Royal Society of Chemistry journal article supplement (doi:10.1039/d1ce00675d), 2021-01-01
Supplement: d1ce00675d1.pdf [file d1ce00675d1.pdf]

## Supporting Information

### **Promoting effect of MXene on 1T/2H-MoSe<sub>2</sub> for hydrogen evolution**

Zhitao Shao, Lili Wu,\* Hongfeng Ye, Xinzhi Ma, Xitian Zhang,\* Lu Li

*Key Laboratory for Photonic and Electronic Bandgap Materials, Ministry of Education, School of Physics and Electronic Engineering, Harbin Normal University, Harbin 150025, China*

---

\*Corresponding authors: Email: wll790107@hotmail.com; xtzhazhang@hotmail.com;

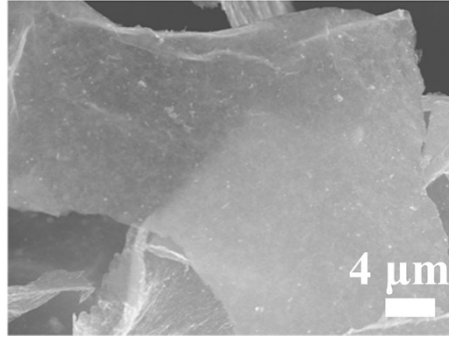

Fig. S1 SEM image of Ti<sub>3</sub>C<sub>2</sub> lamellas.

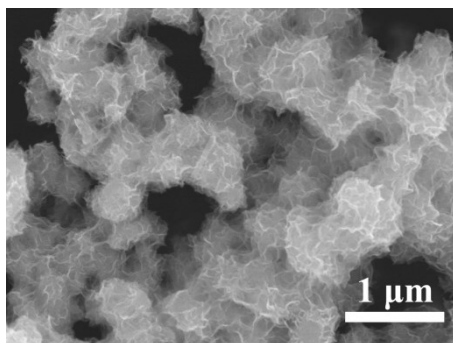

Fig. S2 SEM image of blank MoSe<sub>2</sub> nanoflowers.

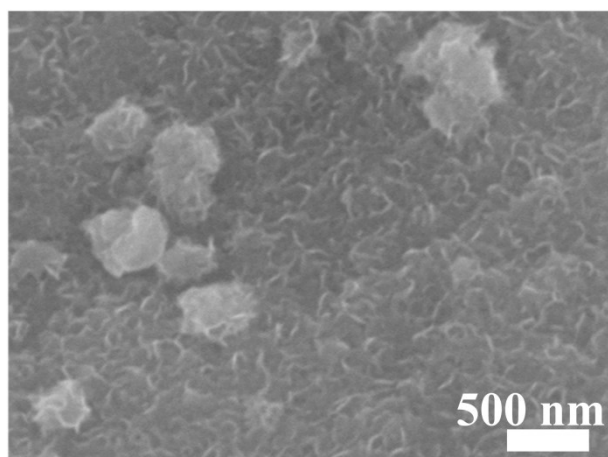

Fig. S3 SEM image of M/T<sub>50</sub>.

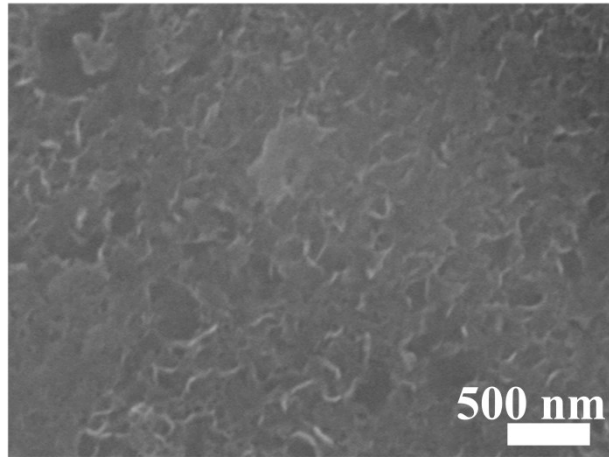

Fig. S4 SEM image of M/T<sub>150</sub>.

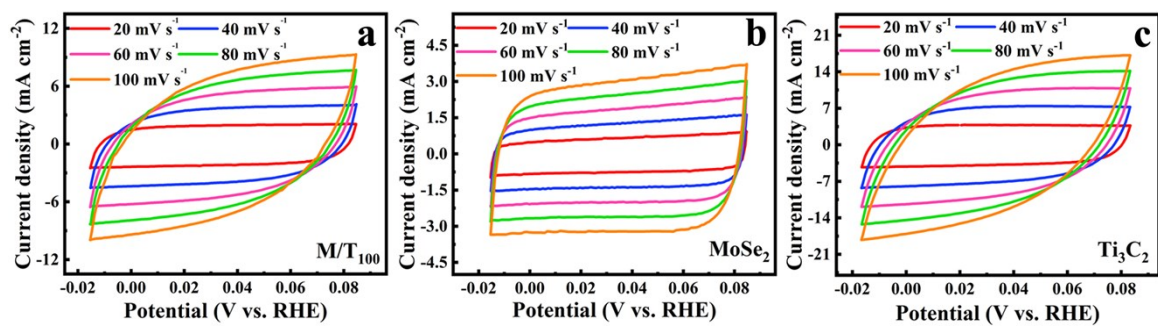

Fig. S5 CV curves of (a) MoSe<sub>2</sub>, (b) Ti<sub>3</sub>C<sub>2</sub>, and (c) M/T<sub>100</sub> at 20-100 mV s<sup>-1</sup>.

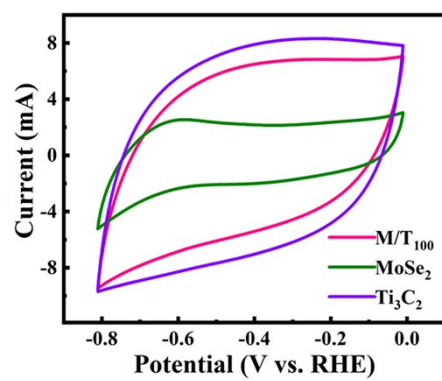

Fig. S6 CV curves of M/T<sub>100</sub>, MoSe<sub>2</sub> and Ti<sub>3</sub>C<sub>2</sub> with scan rate of 50 mV s<sup>-1</sup>.
